# Supplementary material for: The path from a volunteer initiative to an established institution: evaluating 15 years of the development and contribution of the Lighthouse trust to the Malawian HIV response
Source: BMC Health Serv Res. 2017 Aug 9;17:548. doi: 10.1186/s12913-017-2466-y (PMC5551033; doi:10.1186/s12913-017-2466-y)
Supplement: Supplementary file 1 — Interview Topic Guide. The file documents the guiding questions to Lighthouse staff, Ministry of Health employees and external stakeholders. (ODT 8 kb) [file 12913_2017_2466_MOESM1_ESM.odt]

Appendix: Interview Topic Guide

Information Sheet and Informed Consent Form given to all interviewees.

A. Lighthouse staff (clinic, HTC, HBC)

Your department, function, years of employment with Lighthouse, professional background, age.
What are your tasks in the delivery of HIV/Aids services at the Lighthouse?
In your opinion, what are presently the strengths and challenges of your programme / service?
If you had the means and competence to do so, is there anything you would change or introduce to improve the service / programme?
How do you share your experiences and opinion on challenges and opportunities internally?
What has been the most important new component of your programme / service that was introduced during the last two years?
How are you involved in planning of activities and of the programme?
Would you call any component of your programme an innovation?
How do you measure effectiveness and quality of your programme / service?
How do you utilize M&E reports?
Are you involved when conculsions are drawn from M&E and OR findings? How are conclusions drawn?
Do you share experiences, lessons and findings of your programme / service with external organisations or persons? If yes, by what means?
How are such lessons documented internally?
In your working day, on what occasions do you communicate experience with your colleagues? What are the formal communication channels? What are informal communication channels?
Do you have access to external resources and learning about your topic? What kind?
Do your supervisors expect from you that you contribute to learning, reflection and quality improvement?
Do you have time and space for learning and reflection?
How is your collaboration with the Ministry of Health?
With whom do you work in the MoH?
Do you have personal contacts to people working in the MoH?
In your view, what are the strenghts and weaknesses of the MoH concerning your working area?
Have any components of services / programmes of the LH have been taken over and scaled up by the MoH?
If yes, how was the process?

B. Ministry of Health

What are your personal experiences on collaboration with the Lighthouse?
In your view, what does the LH contribute to the development of the Malawi health sector?
In your opinion, what has been the most important innovations in HIV/Aids services in Malawi, where LH was involved?
Why is the LH important for the MoH? How does the MoH benefit of the LH?
In what areas could the LH improve their performance?
At the MPC, the LH is hosting the national TB programme? What is your experience with this partnership? What are the challenges?
Which is the most important project currently running between the MoH and the LH? Future plans?
What innovations do you plan to scale up in the near future?

C. Other stakeholders

What are your personal experiences on collaboration with the Lighthouse?
In your view, what does the LH contribute to the development of the Malawi health sector?
In your opinion, what has been the most important innovations in HIV/Aids services in Malawi, where LH was involved?
Why is the LH important for the MoH? How does the MoH benefit of the LH?
In what areas could the LH improve their performance?
At the MPC, the LH is hosting the national TB programme? What is your experience with this partnership? What are the challenges?
Which is the most important project currently running between the MoH and the LH? Future plans?
What innovations do you plan to scale up in the near future?
